# Supplementary material for: Lrpap1 deficiency leads to myopia through TGF-β-induced apoptosis in zebrafish
Source: Cell Commun Signal. 2022 Oct 19;20:162. doi: 10.1186/s12964-022-00970-9 (PMC9580148; doi:10.1186/s12964-022-00970-9)
Supplement: Supplementary file 5 — Additional file 4. Supplementary Table S3. Information of 165 apoptosis pathway related genes in GSEA analysis. [file 12964_2022_970_MOESM5_ESM.xls]

## Sheet: KEGG_APOPTOSIS_SIGNALING_PATHWA
Supplementary Table S3. Information of 165 apoptosis pathway related genes in GSEA analysis.
NAME	PROBE	RANK IN GENE LIST	RANK METRIC SCORE	RUNNING ES	CORE ENRICHMENT
row_0	lmna	57	2.17213	0.0231978	Yes
row_1	ern2	135	1.81581	0.0413842	Yes
row_2	capn2b	159	1.76762	0.0612229	Yes
row_3	fas	167	1.74972	0.0815084	Yes
row_4	casp8l2	245	1.61381	0.0973198	Yes
row_5	ctss2.1	296	1.54159	0.113391	Yes
row_6	ctsz	317	1.515	0.130383	Yes
row_7	ctsc	431	1.40384	0.142246	Yes
row_8	casp3b	432	1.40356	0.158749	Yes
row_9	sept4b	663	1.24109	0.163891	Yes
row_10	birc5a	734	1.20477	0.175181	Yes
row_11	ikbkb	988	1.08722	0.177569	Yes
row_12	kras	1069	1.05561	0.186693	Yes
row_13	daxx	1080	1.05142	0.198645	Yes
row_14	atm	1121	1.03647	0.209188	Yes
row_15	ctsl.1	1187	1.01666	0.218472	Yes
row_16	ctsba	1238	0.998838	0.228161	Yes
row_17	parp4	1287	0.983686	0.237755	Yes
row_18	tnfrsf1a	1301	0.978362	0.248725	Yes
row_19	si:ch211-202f3.3	1334	0.970313	0.258819	Yes
row_20	ctss2.2	1378	0.956077	0.268294	Yes
row_21	apaf1	1524	0.920399	0.273158	Yes
row_22	casp8	1529	0.919994	0.283811	Yes
row_23	eif2ak3	1574	0.908702	0.292687	Yes
row_24	nfkb1	1634	0.895452	0.300792	Yes
row_25	csf2rb	1637	0.895326	0.311237	Yes
row_26	traf1	1639	0.89519	0.321721	Yes
row_27	casp3a	1659	0.890226	0.331408	Yes
row_28	cflara	1762	0.864871	0.337386	Yes
row_29	tuba1b	1779	0.861982	0.346864	Yes
row_30	ctsh	1859	0.843589	0.353536	Yes
row_31	tradd	1985	0.819575	0.358037	Yes
row_32	bcl2l11	2036	0.807669	0.365479	Yes
row_33	tuba8l4	2056	0.803882	0.37415	Yes
row_34	faslg	2088	0.79851	0.382265	Yes
row_35	casp9	2191	0.779739	0.387242	Yes
row_36	itpr3	2196	0.778427	0.396231	Yes
row_37	casp7	2218	0.774194	0.404471	Yes
row_38	ctsbb	2484	0.729072	0.402155	Yes
row_39	traf2b	2506	0.724801	0.409814	Yes
row_40	nfkbiaa	2530	0.719728	0.417331	Yes
row_41	ctso	2674	0.69022	0.419571	Yes
row_42	pik3r3b	2686	0.687612	0.427204	Yes
row_43	casp8l1	2776	0.673509	0.431466	Yes
row_44	dffb	2780	0.673226	0.439259	Yes
row_45	xiap	2823	0.666673	0.445372	Yes
row_46	nras	2979	0.646773	0.446608	Yes
row_47	fadd	3020	0.640171	0.452491	Yes
row_48	map2k2b	3061	0.636262	0.458329	Yes
row_49	ripk1l	3125	0.629097	0.463137	Yes
row_50	ngfa	3141	0.626506	0.469887	Yes
row_51	actb1	3147	0.625744	0.477039	Yes
row_52	raf1b	3810	0.544326	0.456238	No
row_53	akt1	3843	0.540123	0.461274	No
row_54	casp2	3944	0.528997	0.463385	No
row_55	capn2a	3988	0.524554	0.467786	No
row_56	pik3cb	4169	0.503591	0.466311	No
row_57	tuba8l2	4332	0.488569	0.465399	No
row_58	capn8	4393	0.483106	0.468614	No
row_59	rela	4565	0.466936	0.467078	No
row_60	ctss1	4648	0.460037	0.469118	No
row_61	tp53	4799	0.446169	0.4682	No
row_62	prf1.1	4982	0.428755	0.465763	No
row_63	pmaip1	5203	0.407363	0.461513	No
row_64	mapk1	5385	0.393752	0.458706	No
row_65	akt3a	5572	0.379282	0.455523	No
row_66	pdpk1a	5741	0.365498	0.452917	No
row_67	parp3	5756	0.364373	0.456626	No
row_68	gadd45ga	5920	0.351195	0.454058	No
row_69	parp2	5957	0.349064	0.456683	No
row_70	pidd1	6084	0.339583	0.455499	No
row_71	birc5b	6245	0.328468	0.452786	No
row_72	prf1.9	6258	0.327814	0.456148	No
row_73	tnfa	6630	0.30105	0.444443	No
row_74	bcl2a	7172	0.26735	0.425357	No
row_75	bida	7209	0.265442	0.426999	No
row_76	mapk3	7581	0.240632	0.414584	No
row_77	bcl2l1	7768	0.229256	0.409637	No
row_78	akt2	7819	0.225828	0.410238	No
row_79	prf1.2	7830	0.225494	0.412478	No
row_80	prf1.8	7963	0.217591	0.409613	No
row_81	ctsd	7985	0.216375	0.411294	No
row_82	ctsk	8068	0.211887	0.410416	No
row_83	badb	8213	0.203244	0.406889	No
row_84	lmnb2	8379	0.194943	0.402401	No
row_85	actb2	8524	0.185624	0.398667	No
row_86	zgc:153993	8574	0.182893	0.398804	No
row_87	dab2ipa	8587	0.182102	0.400452	No
row_88	pik3cd	8667	0.178289	0.399302	No
row_89	bcl2b	9232	0.148362	0.377872	No
row_90	hrasb	10129	0.10178	0.342253	No
row_91	pik3r2	10302	0.0929925	0.336278	No
row_92	dab2ipb	10347	0.0906546	0.335536	No
row_93	map3k5	10348	0.0905281	0.336601	No
row_94	raf1a	10444	0.085343	0.333701	No
row_95	map3k14a	10557	0.0794469	0.330033	No
row_96	map2k2a	10798	0.0677099	0.320968	No
row_97	gadd45ab	10932	0.0618068	0.316229	No
row_98	mapk8b	11128	0.0530472	0.308841	No
row_99	diabloa	11207	0.0492161	0.306214	No
row_100	tuba2	11552	0.0334985	0.292473	No
row_101	diablob	11603	0.0315432	0.29079	No
row_102	lmnb1	11731	0.0249142	0.285864	No
row_103	baxa	11881	0.0171198	0.279943	No
row_104	hrasa	12174	0.00450332	0.267998	No
row_105	si:ch211-1i11.3	12226	0.00193323	0.265925	No
row_106	akt3b	12312	-0.00221702	0.262459	No
row_107	hdr	12369	-0.00488273	0.260215	No
row_108	tuba4l	12429	-0.00714021	0.257875	No
row_109	tuba7l	12547	-0.0123829	0.253213	No
row_110	ikbkg	12819	-0.0263792	0.242388	No
row_111	prf1.3	12995	-0.0337438	0.235594	No
row_112	mapk8a	13128	-0.0387961	0.230626	No
row_113	si:ch211-153j24.3	13150	-0.0396634	0.230229	No
row_114	traf2a	13227	-0.043512	0.227618	No
row_115	capn1b	13338	-0.0491278	0.223676	No
row_116	itpr2	13550	-0.0579949	0.215688	No
row_117	zgc:55558	13941	-0.0750668	0.200546	No
row_118	pdpk1b	14108	-0.0830553	0.194701	No
row_119	si:dkeyp-50d11.2	14119	-0.0835973	0.195273	No
row_120	mapk9	14339	-0.0943378	0.187384	No
row_121	mapk10	14410	-0.0979778	0.18566	No
row_122	itpr1b	14558	-0.105688	0.180862	No
row_123	tuba8l3	14806	-0.117021	0.172089	No
row_124	capn1a	15113	-0.129731	0.161041	No
row_125	mcl1a	15446	-0.14425	0.149095	No
row_126	chuk	15493	-0.146672	0.14893	No
row_127	birc2	15543	-0.148483	0.148662	No
row_128	gadd45aa	15797	-0.160019	0.140148	No
row_129	cts12	16038	-0.170054	0.132286	No
row_130	prf1.5	16131	-0.174006	0.130552	No
row_131	sept4a	16249	-0.180682	0.127869	No
row_132	atf4a	16498	-0.193349	0.119952	No
row_133	atf4b	16568	-0.19708	0.119434	No
row_134	pik3ca	16947	-0.2165	0.106448	No
row_135	gadd45bb	17097	-0.224533	0.102965	No
row_136	map2k1	17792	-0.260701	0.0775143	No
row_137	pik3r1	17860	-0.264344	0.0778694	No
row_138	gadd45ba	17902	-0.266033	0.0793128	No
row_139	ptpn13	18415	-0.296007	0.0617553	No
row_140	eif2s1b	18590	-0.306749	0.0582125	No
row_141	jun	18786	-0.318313	0.0539427	No
row_142	ctsla	18807	-0.319397	0.0568764	No
row_143	aifm1	18813	-0.31984	0.0604316	No
row_144	bada	19976	-0.393572	0.017313	No
row_145	ddit3	20271	-0.415863	0.0101224	No
row_146	eif2s1a	20484	-0.430745	0.00647604	No
row_147	itpr1a	21059	-0.473932	-0.011537	No
row_148	prf1.6	21234	-0.486654	-0.0129645	No
row_149	ctsf	21327	-0.494532	-0.01093	No
row_150	ngfb	21565	-0.516005	-0.0146011	No
row_151	nfkbiab	21955	-0.556215	-0.024045	No
row_152	cycsb	22191	-0.585593	-0.0268157	No
row_153	parp1	22363	-0.603773	-0.0267428	No
row_154	dffa	22409	-0.609464	-0.0214258	No
row_155	si:ch211-165b19.5	22684	-0.645602	-0.0250934	No
row_156	fosab	22998	-0.696939	-0.0297598	No
row_157	akt2l	23081	-0.711137	-0.0247676	No
row_158	fosaa	23455	-0.789106	-0.0308157	No
row_159	endog	23656	-0.849286	-0.0290478	No
row_160	lmnl3	23698	-0.866236	-0.0205472	No
row_161	gadd45gb.1	23703	-0.867447	-0.0105121	No
row_162	tuba1c	23953	-0.967544	-0.00936706	No
row_163	si:ch211-114n24.6	24297	-1.25223	-0.00873706	No
row_164	tuba1a	24387	-1.4525	0.00468445	No
